# Supplementary material for: Methane emissions from oil and gas production sites in Alberta, Canada
Source: Oxford University Press journal article supplement (doi:10.1525/elementa.284), 2018-01-01
Supplement: elementa-6-284-s1.xlsx [file elementa-6-284-s1.xlsx]

## Sheet: RedDeer_sites
Site_ID	Method	CH4_emission_rate_kgh	CH4_LB	CH4_UB	Gas_production_mcfd	Oil_production_bbld	Age_yr	wells_per_site	Reported_emissions_kgh	Gas_composition_c1_percent	both_methods
1	tracer flux	0.05	0	0.1	31.3	0	8.2	1	0	95.39
2	tracer flux	0.75	0.6	0.9	20.2	0	23	1	0.0021	86.71
3	tracer flux	0.29	0	0.5	26.5	0	18.3	1	0	86.27
4	Gaussian dispersion	0.02	0	0.1	42.3	0	9.4	1	0.0036	97.41
5	tracer flux	0.18	0.1	0.3	5.5	0	23	1	0.0006	86.27
6	Gaussian dispersion	0.66	0.2	2.2	21.5	0.1	20.7	1	0	79.66
7	tracer flux	0.22	0.1	0.4	20.1	0	12.4	1	0.0021	87.6
8	tracer flux	0.13	-0.7	1	50.4	0	20.2	1	0.0052	87.6
9	tracer flux	0.23	0.1	0.4	19.2	0	21.6	1	0.002	89.56
10	Gaussian dispersion	0.12	0	0.4	1.2	8.4	4.8	1	0	80.84
11	Gaussian dispersion	0.63	0.2	2.1	114.4	0	16.8	1	0	87.85
12	Gaussian dispersion	0.14	0	0.5	47.1	0	6	1	0	96.38
13	Gaussian dispersion	79.99	26.7	267.2	4.2	0	9.4	1	0	95.88
14	Gaussian dispersion	0.55	0.2	1.8	359.9	1.4	45.5	1	0	78.75
15	Gaussian dispersion	3.77	1.3	12.6	145.5	0.7	41.7	1	0.1525	79.59
16	Gaussian dispersion	0.54	0.2	1.8	54.9	0	15.2	2	0	83.34
17	Gaussian dispersion	3.32	1.1	11.1	136.4	0.5	30.5	1	0	81.69
18	Gaussian dispersion	37.79	12.6	126.2	0	0	12.3	1	0	82.89
19	Gaussian dispersion	5.6	1.9	18.7	53.2	0	29.2	1	0	80.64
20	tracer flux	0.21	0	0	0	0	51.4	1	0	NA
21	tracer flux	0.06	0	0.1	0.4	2.3	54.3	0	0	79.86
22	Gaussian dispersion	1.83	0.2	3.5	217.9	0	14.9	1	0	80.47
23	tracer flux	1.75	1.6	1.9	217.9	0	14.9	1	0	80.47
24	tracer flux	0.29	0.2	0.3	0	0	28.2	1	0	70.25
25	tracer flux	0.25	-0.1	0.6	0.5	1.9	49.6	1	0	81.85
26	tracer flux	1.17	0.9	1.4	165.6	3.8	19.4	1	1.0635	79.32
27	tracer flux	9.6	2.4	16.8	215.3	1.3	39.7	1	0	78.28
28	Gaussian dispersion	0.79	0.2	1.4	29.7	0.8	22.4	1	0	82.54
29	tracer flux	0.61	0.5	0.8	29.7	0.8	22.4	1	0	82.54
30	Gaussian dispersion	13.66	4.6	45.6	171.6	1.1	33.6	2	0.0147	83.21	a
31	tracer flux	3.46	0	0	171.6	1.1	33.6	2	0.0147	83.21	a
32	Gaussian dispersion	17.27	5.8	57.7	134.8	0.6	10.1	1	0.0118	81.38
33	tracer flux	10.35	7.4	13.3	161.6	0	25.9	1	0.0141	80.97
34	Gaussian dispersion	14.42	4.8	48.2	403.6	1.2	21.6	1	0	81.24
35	Gaussian dispersion	3.86	1.3	12.9	308.5	6.1	33.3	2	0	79.47
36	Gaussian dispersion	5.08	1.7	17	83.5	0.4	11	1	0.0071	78.98
37	Gaussian dispersion	3.13	1	10.5	130.1	0	27.5	1	0.0115	81.87
38	Gaussian dispersion	2.5	0.8	8.3	205.8	0	22.8	1	0.018	81.06
39	Gaussian dispersion	22.03	7.4	73.6	0	0	11.8	1	0	79.05
40	tracer flux	0.58	0.4	0.8	49.9	0	12	1	0	82.35
41	Gaussian dispersion	13.69	4.6	45.7	5.3	6.5	20.4	1	1.0111	81.21
42	tracer flux	2.53	1.3	3.7	59.9	0.2	19.4	1	0	79.64
43	Gaussian dispersion	0.97	0.3	3.2	95.9	1.6	16.4	1	0.2008	78.73
44	tracer flux	3.06	1.2	4.9	31.9	0	4.1	1	0	78.64	b
45	Gaussian dispersion	0.87	0.3	2.9	31.9	0	4.1	1	0	78.64	b
46	tracer flux	3.23	1.8	4.7	121.4	0	16.8	1	2.3353	76.2
47	Gaussian dispersion	3.73	1.2	12.5	227	0	17.4	1	8.1392	75.88	c
48	tracer flux	1.48	0.5	2.5	227	0	17.4	1	8.1392	75.88	c
49	Gaussian dispersion	0.84	0.3	2.8	522.7	0	9	1	0	95.92
50	Gaussian dispersion	1.34	0.9	1.8	10.6	6.9	6	1	0.0631	82.7
51	Gaussian dispersion	0.29	0.1	1	92.5	0	12.5	1	0	81.16
52	tracer flux	0.41	0.1	0.8	0	0	4.8	2	0	0
53	Gaussian dispersion	4.16	1.4	13.9	19.4	2.7	51.3	1	0.0385	81.23
54	Gaussian dispersion	21.3	7.1	71.2	512.2	437.7	0.2	1	0	80.23
55	Gaussian dispersion	0.83	0.3	2.8	655	0	4.9	3	0	83.69
56	Gaussian dispersion	0.21	0.1	0.7	0	0	5.7	1	0	81.64
57	Gaussian dispersion	8.6	2.9	28.8	460	285.4	2.5	2	0	80.23
58	tracer flux	1.57	-0.4	3.6	91.4	0	9.9	1	0	78.28
59	tracer flux	6.33	2.9	9.7	80.4	8.4	4.9	2	0.394	82.34	d
60	Gaussian dispersion	5.48	1.8	18.3	80.4	8.4	4.9	2	0.394	82.34	d
